# Supplementary material
Source: publisher site journal article supplement (https://www.dovepress.com/article/495647)
Supplement: Supplementary file 1 [file get_supplementary_file.php]

**Supplementary Figure 1.** Goodness-of-fit plots for the final model. Conditional weighted residuals for midazolam (A) and 1-hydroxymidazolam (B) continuous infusion vs. time

**Supplementary Table 1.** SNP typing and Hardy-Weinberg equilibrium analysis results (n=61)

aThe rs2032582 locus has multiple types (AA, CA, CC, CT, TT, AT) and is divided into three groups (A/C, A/T, and C/T) for analysis. SNP：gene single nucleotide polymorphisms

**Supplementary Table 2.** Covariate screening method table for population pharmacokinetic models

**Supplementary Figure 1.**


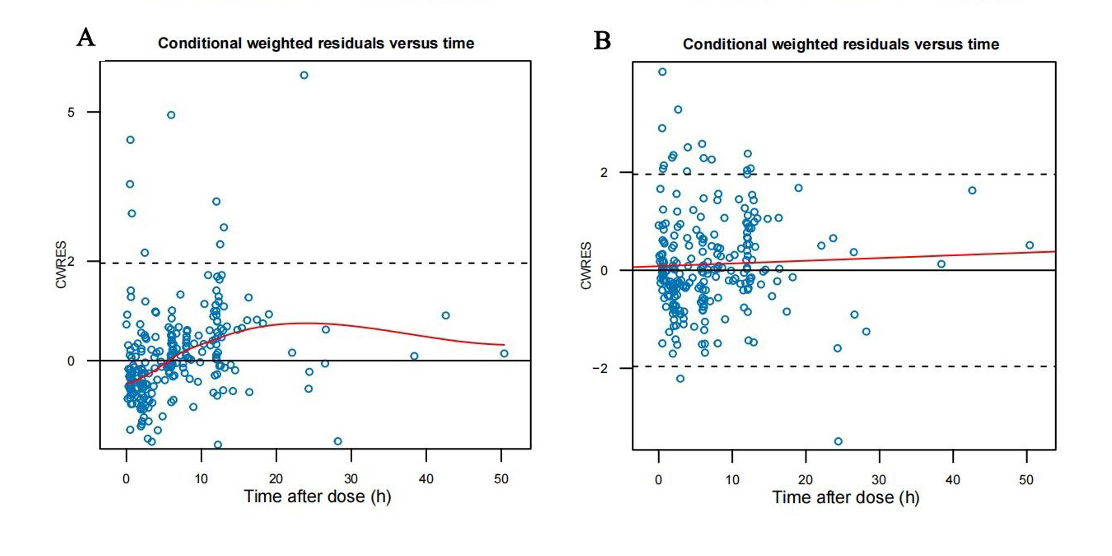


**Supplementary Table 1.**

| Gene | SNP | Genotype (n) | Frequency (%) | Allele | Frequency (%) | P-value |
| --- | --- | --- | --- | --- | --- | --- |
| CYP3A4 | rs2242480 | CC | 26(42.6) | C | 79(64.8) | 1 |
|  |  | CT | 27(44.3) | T | 43(35.2) |  |
|  |  | TT | 8(13.1) |  |  |  |
| CYP3A4 | rs2246709 | AA | 23(37.7) | A | 77(63.1) | 0.890 |
|  |  | AG | 31(50.8) | G | 45(36.9) |  |
|  |  | GG | 7(11.5) |  |  |  |
| CYP3A5 | rs776746 | TT | 5(8.2) | T | 40(32.8) | 0.851 |
|  |  | CT | 30(49.2) | C | 82(67.2) |  |
|  |  | CC | 26(42.6) |  |  |  |
| CYP3A5 | rs15524 | AA | 27(44.3) | A | 83(68.0) | 0.914 |
|  |  | AG | 29(47.5) | G | 39(32.0) |  |
|  |  | GG | 5(8.2) |  |  |  |
| ABCB1 | rs1128503 | AA | 27(44.3) | A | 85(70.0) | 0.452 |
|  |  | AG | 31(50.8) | G | 37(30.0) |  |
|  |  | GG | 3(4.9) |  |  |  |
| ABCB1 | rs1045642 | AA | 8(13.1) | A | 51(41.8) | 0.618 |
|  |  | AG | 35(57.4) | G | 71(58.2) |  |
|  |  | GG | 18(29.5) |  |  |  |
| ABCB1 | rs2032582a | AA | 10(16.9) | A | 46(54.8) | 0.470 |
|  |  | CA | 26(44.1) | C | 38(45.2) |  |
|  |  | CC | 6(10.2) |  |  |  |
|  |  | AA | 10(16.9) | A | 28(77.8) | 0.513 |
|  |  | AT | 8(13.6) | T | 8(22.2) |  |
|  |  | TT | 0(0) |  |  |  |
|  |  | CC | 6(10.2) | C | 21(70.0) | 0.439 |
|  |  | CT | 9(15.3) | T | 9(30.0) |  |
|  |  | TT | 0(0) |  |  |  |
| PXR | rs1464603 | GG | 7(11.9) | A | 52(44.0) | 0 |
|  |  | AG | 52(88.1) | G | 66(56.0) |  |
|  |  | AA | 0(0) |  |  |  |
| PXR | rs1464602 | GG | 6(10.2) | A | 80(67.8) | 1 |
|  |  | AG | 26(44.1) | G | 38(32.2) |  |
|  |  | AA | 27(45.7) |  |  |  |
| PXR | rs3732357 | GG | 6(9.8) | A | 81(66.4) | 0.92 |
|  |  | AG | 29(47.5) | G | 41(33.6) |  |
|  |  | AA | 26(42.6) |  |  |  |
| PXR | rs6785049 | GG | 16(26.2) | A | 60(49.2) | 1 |
|  |  | AG | 30(49.2) | G | 62(50.8) |  |
|  |  | AA | 15(24.6) |  |  |  |
| PXR | rs2276707 | CC | 21(34.4) | C | 72(59.0) | 1 |
|  |  | CT | 30(49.2) | T | 50(41.0) |  |
|  |  | TT | 10(16.4) |  |  |  |
| PXR | rs10934498 | GG | 3(4.9) | A | 94(77.0) | 1 |
|  |  | AG | 22(36.1) | G | 28(23.0) |  |
|  |  | AA | 36(59.0) |  |  |  |
| PXR | rs3814055 | CC | 37(60.7) | C | 95(77.9) | 1 |
|  |  | CT | 21(34.4) | T | 27(22.1) |  |
|  |  | TT | 3(4.9) |  |  |  |
| PXR | rs2472677 | CC | 6(10.2) | C | 38(32.2) | 1 |
|  |  | CT | 26(44.1) | T | 80(67.8) |  |
|  |  | TT | 27(45.7) |  |  |  |
| PXR | rs3732359 | GG | 18(29.5) | A | 58(47.5) | 0.936 |
|  |  | AG | 28(45.9) | G | 64(52.5) |  |
|  |  | AA | 15(24.6) |  |  |  |
| PXR | rs3814058 | TT | 19(31.1) | C | 56(45.9) | 0.936 |
|  |  | CT | 28(45.9) | T | 66(54.1) |  |
|  |  | CC | 14(23.0) |  |  |  |
| PXR | rs3732360 | CC | 18(29.5) | C | 64(52.5) | 0.936 |
|  |  | CT | 28(45.9) | T | 58(47.5) |  |
|  |  | TT | 15(24.6) |  |  |  |
| PXR | rs4688040 | GG | 29(48.3) | G | 83(69.2) | 1 |
|  |  | GT | 25(41.7) | T | 37(30.8) |  |
|  |  | TT | 6(10.0) |  |  |  |
| PXR | rs2276706 | GG | 37(61.7) | A | 26(21.7) | 1 |
|  |  | AG | 20(33.3) | G | 94(78.3) |  |
|  |  | AA | 3(5) |  |  |  |
| PXR | rs1523130 | TT | 3(4.9) | C | 94(77.0) | 1 |
|  |  | CT | 22(36.1) | T | 28(23.0) |  |
|  |  | CC | 36(59.0) |  |  |  |
| PXR | rs2461817 | AA | 6(9.8) | A | 37(30.3) | 0.994 |
|  |  | AC | 25(41.0) | C | 85(69.7) |  |
|  |  | CC | 30(49.2) |  |  |  |
| PXR | rs1523127 | CC | 2(3.2) | A | 96(78.7) | 0.792 |
|  |  | AC | 22(36.1) | C | 26(21.3) |  |
|  |  | AA | 37(60.7) |  |  |  |

**Supplementary Table 2.**

| Model number | Model | OFV | dOFV |
| --- | --- | --- | --- |
| Base model |  | -1516.696 |  |
| First Round of Forward Inclusion |  |  |  |
| 1 | base model + BW on CL1 | -1520.298 | -3.602 |
| 2 | base model + HT on CL1 | -1517.45 | -0.754 |
| 3 | base model + BMI on CL1 | -1517.043 | -0.347 |
| 4 | base model + SEX on CL1 | -1517.82 | -1.124 |
| 5 | base model + AGE on CL1 | -1516.83 | -0.134 |
| 6 | base model + TBIL on CL1 | -1516.772 | -0.076 |
| 7 | base model + ALB on CL1 | -1517.827 | -1.131 |
| 8 | base model + ALT on CL1 | -1520.758 | -4.602 |
| 9 | base model + AST on CL1 | -1525.24 | -8.544 |
| 10 | base model + ALP on CL1 | -1523.387 | -6.691 |
| 11 | base model + GGC on CL1 | -1522.882 | -6.186 |
| 12 | base model + IL-6 on CL1 | -1516.766 | -0.07 |
| 13 | base model + CRP on CL1 | -1519.302 | -2.606 |
| 14 | base model + PT on CL1 | -1516.715 | -0.019 |
| 15 | base model + CLcr on CL1 | -1517.112 | -0.416 |
| 16 | base model + APACHE II on CL1 | -1517.345 | -0.649 |
| 17 | base model + FTN on CL1 | -1516.966 | -0.27 |
| 18 | base model + SFTN on CL1 | -1517.349 | -0.653 |
| 19 | base model + RFTN on CL1 | -1518.802 | -0.106 |
| 20 | base model + JPNL on CL1 | -1516.752 | -0.056 |
| 21 | base model + BBF on CL1 | -1517.141 | -0.445 |
| 22 | base model + BW on CL2 | -1524.614 | -7.918 |
| 23 | base model + HT on CL2 | -1517.45 | 0.754 |
| 24 | base model + BMI on CL2 | -1516.969 | 0.273 |
| 25 | base model + SEX on CL2 | -1516.704 | -0.008 |
| 26 | base model + AGE on CL2 | -1519.245 | -2.549 |
| 27 | base model + TBIL on CL2 | -1517.215 | -0.519 |
| 28 | base model + ALB on CL2 | -1520.742 | -4.406 |
| 29 | base model + ALT on CL2 | -1518.204 | -1.508 |
| 30 | base model + AST on CL2 | -1516.827 | -0.131 |
| 31 | base model + ALP on CL2 | -1517.401 | -0.705 |
| 32 | base model + GGC on CL2 | -1517.654 | -0.958 |
| 33 | base model + IL-6 on CL2 | -1518.524 | -1.828 |
| 34 | base model + CRP on CL2 | -1517.414 | -0.718 |
| 35 | base model + PT on CL2 | -1517.097 | -0.401 |
| 36 | base model + CLcr on CL2 | -1518.18 | -1.484 |
| 37 | base model + APACHE II on CL2 | -1518.247 | -1.551 |
| 38 | base model + FTN on CL2 | -1516.811 | -0.115 |
| 39 | base model + SFTN on CL2 | -1517.197 | -0.501 |
| 40 | base model + RFTN on CL2 | -1517.637 | -0.941 |
| 41 | base model + JPNL on CL2 | -1517.03 | -0.334 |
| 42 | base model + BBF on CL2 | -1518.564 | -1.868 |
| 43 | base model + rs1045642 AA on CL1 | -1517.074 | -0.378 |
| 44 | base model + rs1045642 AG on CL1 | -1516.697 | -0.001 |
| 45 | base model + rs1045642 GG on CL1 | -1516.859 | -0.163 |
| 46 | base model + rs10934498 GG on CL1 | -1517.641 | -0.945 |
| 47 | base model + rs10934498 GA on CL1 | -1518.754 | -2.058 |
| 48 | base model + rs10934498 AA on CL1 | -1517.544 | -0.848 |
| 49 | base model + rs1128503 AA on CL1 | -1517.316 | -0.62 |
| 50 | base model + rs1128503 AG on CL1 | -1517.816 | -1.12 |
| 51 | base model + rs1128503 GG on CL1 | -1517.069 | -0.373 |
| 52 | base model + rs1464602 GG on CL1 | -1517.197 | -0.501 |
| 53 | base model + rs1464602 GA on CL1 | -1518.473 | -1.777 |
| 54 | base model + rs1464602 AA on CL1 | -1520.081 | -3.385 |
| 55 | base model + rs1523127 CC on CL1 | -1517.538 | -0.842 |
| 56 | base model + rs1523127 CA on CL1 | -1517.863 | -1.167 |
| 57 | base model + rs1523127 AA on CL1 | -1517.171 | -0.475 |
| 58 | base model + rs1523130 TT on CL1 | -1517.641 | -0.945 |
| 59 | base model + rs1523130 TC on CL1 | -1518.571 | -1.875 |
| 60 | base model + rs1523130 CC on CL1 | -1517.434 | -0.738 |
| 61 | base model + rs15524 AA on CL1 | -1516.963 | -0.267 |
| 62 | base model + rs15524 AG on CL1 | -1516.801 | -0.105 |
| 63 | base model + rs15524 GG on CL1 | -1516.828 | -0.132 |
| 64 | base model + rs2242480 CC on CL1 | -1517.025 | -0.329 |
| 65 | base model + rs2242480 CT on CL1 | -1516.795 | -0.099 |
| 66 | base model + rs2242480 TT on CL1 | -1516.837 | -0.141 |
| 67 | base model + rs2246709 AA on CL1 | -1517.444 | -0.748 |
| 68 | base model + rs2246709 AG on CL1 | -1518.754 | -2.058 |
| 69 | base model + rs2246709 GG on CL1 | -1517.513 | -0.817 |
| 70 | base model + rs2276706 GG on CL1 | -1517.384 | -0.688 |
| 71 | base model + rs2276706 GA on CL1 | -1518.51 | -1.814 |
| 72 | base model + rs2276706 AA on CL1 | -1517.641 | -0.945 |
| 73 | base model + rs2276707 CC on CL1 | -1521.786 | -5.09 |
| 74 | base model + rs2276707 CT on CL1 | -1520.518 | -3.822 |
| 75 | base model + rs2276707 TT on CL1 | -1516.741 | -0.045 |
| 76 | base model + rs2461817 AA on CL1 | -1518.061 | -1.365 |
| 77 | base model + rs2461817 AC on CL1 | -1520.175 | -3.479 |
| 78 | base model + rs2461817 CC on CL1 | -1523.411 | -6.715 |
| 79 | base model + rs2472677 CC on CL1 | -1519.895 | -3.199 |
| 80 | base model + rs2472677 CT on CL1 | -1517.136 | -0.44 |
| 81 | base model + rs2472677 TT on CL1 | -1520.215 | -3.519 |
| 82 | base model + rs3732357 GG on CL1 | -1518.776 | -2.08 |
| 83 | base model + rs3732357 GA on CL1 | -1516.713 | -0.017 |
| 84 | base model + rs3732357 AA on CL1 | -1517.788 | -1.092 |
| 85 | base model + rs3732359 GG on CL1 | -1516.844 | -0.148 |
| 86 | base model + rs3732359 GA on CL1 | -1520.079 | -3.383 |
| 87 | base model + rs3732359 AA on CL1 | -1523.306 | -6.61 |
| 88 | base model + rs3732360 CC on CL1 | -1516.844 | -0.148 |
| 89 | base model + rs3732360 CT on CL1 | -1520.079 | -3.383 |
| 90 | base model + rs3732360 TT on CL1 | -1523.306 | -6.61 |
| 91 | base model + rs3814055 CC on CL1 | -1517.171 | -0.475 |
| 92 | base model + rs3814055 CT on CL1 | -1518.138 | -1.442 |
| 93 | base model + rs3814055 TT on CL1 | -1517.641 | -0.945 |
| 94 | base model + rs3814058 TT on CL1 | -1522.078 | -5.382 |
| 95 | base model + rs3814058 CT on CL1 | -1519.893 | -3.197 |
| 96 | base model + rs3814058 CC on CL1 | -1516.85 | -0.154 |
| 97 | base model + rs4688040 GG on CL1 | -1521.322 | -4.626 |
| 98 | base model + rs4688040 GT on CL1 | -1518.812 | -2.116 |
| 99 | base model + rs4688040 TT on CL1 | -1518.061 | -1.365 |
| 100 | base model + rs6785049 GG on CL1 | -1516.773 | -0.077 |
| 101 | base model + rs6785049 GA on CL1 | -1520.479 | -3.783 |
| 102 | base model + rs6785049 AA on CL1 | -1523.306 | -6.61 |
| 103 | base model + rs776746 TT on CL1 | -1516.828 | -0.132 |
| 104 | base model + rs776746 CT on CL1 | -1517.007 | -0.311 |
| 105 | base model + rs776746 CC on CL1 | -1516.269 | -0.573 |
| 106 | base model+rs2032582AA on CL1 | -1516.786 | -0.09 |
| 107 | base model +rs2032582AT on CL1 | -1516.743 | -0.047 |
| 108 | base model+rs2032582CC on CL1 | -1518.059 | -1.363 |
| 109 | base model+rs2032582CA on CL1 | -1516.862 | -0.166 |
| 110 | base model+rs2032582CT on CL1 | -1516.888 | -0.192 |
| Second Round of Forward Inclusion |  |  |  |
| 111 | model 9 + ALT on CL1 | -1525.638 | -0.398 |
| 112 | model 9 + ALP on CL1 | -1528.584 | -3.344 |
| 113 | model 9 + GGC on CL1 | / | / |
| 114 | model 9 + BW on CL2 | -1533.262 | -8.022 |
| 115 | model 9 + ALB on CL2 | -1529.23 | -3.79 |
| 116 | model 9 + rs2276707 CC on CL1 | -1529.987 | -4.747 |
| 117 | model 9 + rs2461817 CC on CL1 | -1532.844 | -7.604 |
| 118 | model 9 + rs3732359 AA on CL1 | -1531.584 | -6.344 |
| 119 | model 9 + rs3732360 TT on CL1 | -1531.584 | -6.344 |
| 120 | model 9 + rs3814058 TT on CL1 | -1530.075 | -4.835 |
| 121 | model 9 + rs4688040 GG on CL1 | -1537.078 | -4.838 |
| 122 | model 9 + rs6785049 AA on CL1 | -1531.584 | -6.344 |
| Third Round of Forward Inclusion |  |  |  |
| 123 | model114 + rs2276707 CC on CL1 | -1537.798 | -4.536 |
| 124 | model114 + rs2461817 CC on CL1 | -1540.702 | -7.44 |
| 125 | model 114 + rs3732359 AA on CL1 | -1539.535 | -6.273 |
| 126 | model 114 + rs3732360 TT on CL1 | -1539.535 | -6.273 |
| 127 | model 114 + rs3814058 TT on CL1 | -1537.991 | -4.729 |
| 128 | model114 + rs4688040 GG on CL1 | -1537.987 | -4.725 |
| 129 | model 114 + rs6785049 AA on CL1 | -1539.535 | -6.273 |
| Fourth Round of Forward Inclusion |  |  |  |
| 130 | model124 + rs2276707 CC on CL1 | / | / |
| 131 | model 124 + rs3732359 AA on CL1 | -1547.304 | -6.602 |
| 132 | model 124 + rs3732360 TT on CL1 | -1547.304 | -6.602 |
| 133 | model 124 + rs3814058 TT on CL1 | / | / |
| 134 | model124 + rs4688040 GG on CL1 | -1541.529 | -0.827 |
| 135 | model 124 + rs6785049 AA on CL1 | -1547.304 | -6.602 |
| Fifth Round of Forward Inclusion |  |  |  |
| 136 | model 131 + rs3732360 TT on CL1 | / | / |
| 137 | model 131 + rs6785049 AA on CL1 | / | / |
| Backward Elimination |  |  |  |
| 138 | model 131 - rs3732359 AA on CL1 | -1540.702 | 6.602 |
| 139 | Model 131 - rs2461817 CC on CL1 | -1539.535 | 7.769 |
| 140 | model 131 - BW on CL2 | -1539.747 | 7.557 |
| 141 | model 131 - AST on CL1 | -1538.576 | 8.728 |

**OFV:** objective function value; **BW:** body weight; **HT:** height; **APACHE II:** Acute Physiology and Chronic Health Evaluation II score; **SCr:** serum creatinine; **CRP:** C-reactive protein ; **IL-6:** interleukin-6; **ALP:** alkaline phosphatase； **GGT:** γ₋glutamyl transpeptidase ; **AST:** aspartate aminotransferase; **ALT:** alanine aminotransferase; **TBIL:** total bilirubin; **ALB:** albumin; BMI: body mass index; **CLcr:** clearance creatinine; **PT:** prothrombin time; **FTN:** fentanyl; **SFTN:** sufentanil; **RFTN:** remifentanil; BBF: propofol; **JPNL:** methylprednisolone; **CL1:** clearance of midazolam; **CL2:** clearance of 1-hydroxymidazolam

**NONMEM code**

;; 1. Based on: B04

;; 2. Description: FINAL

;; x1. Author: user

;1.Description:For MDZ AND 1OHMDZ

$SIZES MAXFCN =900000000

$PROBLEM parent and metabolite

$INPUT ID DATE TIME DV CMT MDV EVID AMT RATE SEX BW HT BMI AGE IBIL ALB ALT AST ALP GGC IL PT CREA CLCR GFR A1 A2 A3 A4 A5 A6 A7 A8 A9 A10 A11 A12 A13 A14 A15 A16 A17 A18 A19 A20 A21 A22

$DATA MDZOHfinal.CSV IGNORE=#

$SUBROUTINES ADVAN6 TOL=3 ;(ADVAN6,8,9,13 NEED TOL)

$MODEL

COMP (CENTPRNT,DEFOBS) ; parent drug, default observation compartment

COMP (CENTMETB) ; central metabolism

$PK

V1=THETA(1)

TVCL1=THETA(2)

CL1=TVCL1*(1+THETA(6)*A21)* (AST/37)**THETA(7)*EXP(ETA(1))

TVCL2=THETA(3)

CL2=TVCL2*(BW/62)**THETA(8)*EXP(ETA(2))

V2=THETA(4)

FMET=THETA(5)

K=CL1/V1

K12=FMET*K

K10=K-K12

K20=CL2/V2

S1=V1/1000

S2=V2/1000

$DES

DADT(1)=-K*A(1)

DADT(2)=-K20*A(2)+K12*A(1)

$ERROR

IPRED = F

IRES = DV - IPRED

DEL = 0

IF (DV .EQ. 0) DEL=1

IWRES = (1-DEL) * IRES / (DV + DEL)

IF (CMT.EQ.1) TYPE=0

IF (CMT.EQ.2) TYPE=1

Y=(F*(1+EPS(1))+EPS(2))*(1-TYPE)+(F+EPS(3))*TYPE ;COMB

$THETA

(0,16) ;V1 MDZ L

(0,22.6) ;CL1 MDZ L/h

(0,67.1) ;CL2 1-OHMDZ L/h

(0,86.2) ;V2

0.6 FIX ;FMET

-0.405

-0.397

1.58

$OMEGA

0.353;BSV-CL1 MDZ

0.333 ;BSV-CL2 MDZ

$SIGMA

0.16 ;EPS(1) MDZ

0.036 ;EPS(2)

0.00105 ;EPS(3) 1-OHMDZ

$ESTIMATION METHOD=1 INTER MAXEVAL=9999 POSTHOC NOABORT

$COV

$TABLE ID DATE TIME DV MDV EVID AMT RATE SEX AGE IPRED PRED ONEHEADER NOPRINT FILE=pandm.XLSX
